# Supplementary material
Source: publisher figshare collection journal article supplement (https://acs.figshare.com/ndownloader/files/13782125)
Supplement: Supplementary file 1 [file 13782125]

w	SMILES	RIPK1 IC50 (um)
1	NC1=C2C(N(C)N=C2C3=CC=C(NC(CC4=CC=CC(C(F)(F)F)=C4)=O)C=C3)=NC=N1	0.077
8a	NC1=C2C(N(C)N=C2C3=CC(F)=C(NC(CC4=CC=CC(C(F)(F)F)=C4)=O)C=C3)=NC=N1	0.079
8b	NC1=C2C(N(C)N=C2C3=CC(Cl)=C(NC(CC4=CC=CC(C(F)(F)F)=C4)=O)C=C3)=NC=N1	0.094
8c	NC1=C2C(N(C)N=C2C3=C(F)C=C(NC(CC4=CC=CC(C(F)(F)F)=C4)=O)C=C3)=NC=N1	0.049
8d	CC1=CC(C2=NN(C)C3=NC=NC(N)=C32)=CC=C1NC(CC4=CC=CC(C(F)(F)F)=C4)=O	0.134
8e	NC1=C2C(N(C)N=C2C3=CC=C(NC(CC4=CC=CC(C(F)(F)F)=C4)=O)C(OC)=C3)=NC=N1	0.424
8f	NC1=C2C(N(C)N=C2C3=CC=C(NC(CC4=CC=CC(C(F)(F)F)=C4)=O)C(CC)=C3)=NC=N1	0.107
8g	NC1=C2C(N(C)N=C2C3=CC=C(NC(CC4=CC=CC(C(F)(F)F)=C4)=O)C(C(C)C)=C3)=NC=N1	0.531
13a	NC1=C2C(N(C)N=C2C3=CC4=C(N(CC4)C([C@H](C)C5=CC=CC=C5)=O)C=C3)=NC=N1	3.457
13b	NC1=C2C(N(C)N=C2C3=CC4=C(N(CC4)C([C@@H](C)C5=CC=CC=C5)=O)C=C3)=NC=N1	2.994
13c	NC1=C2C(N(C)N=C2C3=CC4=C(N(CC4)C(NC5=CC=CC(C(F)(F)F)=C5)=O)C=C3)=NC=N1	0.049
13d	NC1=C2C(N(C)N=C2C3=CC4=C(N(CC4)C(CCC5=CC=CC(C(F)(F)F)=C5)=O)C=C3)=NC=N1	0.017
13e	NC1=C2C(N(C)N=C2C3=CC4=C(N(CC4)C(CC5=CC=CC(C(F)(F)F)=C5)=O)C=C3)=NC=N1	0.014
13f	NC1=C2C(N(C)N=C2C3=CC4=C(N(CC4)C(CC5=CC=CC(F)=C5)=O)C=C3)=NC=N1	0.061
13g	NC1=C2C(N(C)N=C2C3=CC4=C(N(CC4)C(CC5=CC=CC(Cl)=C5)=O)C=C3)=NC=N1	0.058
13h	NC1=C2C(N(C)N=C2C3=CC4=C(N(CC4)C(CC5=CC=CC(Br)=C5)=O)C=C3)=NC=N1	0.026
13i	NC1=C2C(N(C)N=C2C3=CC4=C(N(CC4)C(CC5=CC=CC(OC(F)(F)F)=C5)=O)C=C3)=NC=N1	0.01
13j	NC1=C2C(N(C)N=C2C3=CC4=C(N(CC4)C(CC5=CC=CC(C)=C5)=O)C=C3)=NC=N1	0.056
13k	NC1=C2C(N(C)N=C2C3=CC4=C(N(CC4)C(CC5=CC=CC(OC)=C5)=O)C=C3)=NC=N1	0.116
13l	NC1=C2C(N(C)N=C2C3=CC4=C(N(CC4)C(CC5=CC=CC(C#N)=C5)=O)C=C3)=NC=N1	0.19
13m	NC1=C2C(N(C)N=C2C3=CC4=C(N(CC4)C(CC5=CC=C(C(F)(F)F)C=C5)=O)C=C3)=NC=N1	0.128
13n	NC1=C2C(N(C)N=C2C3=CC4=C(N(CC4)C(CC5=CC=C(Cl)C=C5)=O)C=C3)=NC=N1	0.704
13o	NC1=C2C(N(C)N=C2C3=CC4=C(N(CC4)C(CC5=CC=C(Br)C=C5)=O)C=C3)=NC=N1	0.392
13p	NC1=C2C(N(C)N=C2C3=CC4=C(N(CC4)C(CC5=CC(C(F)(F)F)=CC(F)=C5)=O)C=C3)=NC=N1	0.018
13q	NC1=C2C(N(C)N=C2C3=CC4=C(N(CC4)C(CC5=CC(C(F)(F)F)=CC(C(F)(F)F)=C5)=O)C=C3)=NC=N1	0.264
13r	NC1=C2C(N(C)N=C2C3=CC4=C(N(CC4)C(CC5=CC=C(Cl)C(C(F)(F)F)=C5)=O)C=C3)=NC=N1	0.028
17a	CN1C2=NC=NC=C2C(C3=CC4=C(N(CC4)C(CC5=CC=CC(OC(F)(F)F)=C5)=O)C=C3)=N1	0.634
17b	CN1C2=NC=NC=C2C(C3=CC4=C(N(CC4)C(CC5=CC=CC(OC(F)(F)F)=C5)=O)C=C3)=C1	0.468
22a	CN1C2=NC=NC(N)=C2C(C3=CC4=C(N(CC4)C(CC5=CC=CC(OC(F)(F)F)=C5)=O)C=C3)=C1	0.013
22b	O=C(CC1=CC=CC(OC(F)(F)F)=C1)N(CC2)C(C=C3)=C2C=C3C4=CN(CC)C5=NC=NC(N)=C54	0.011
22c	O=C(CC1=CC=CC(OC(F)(F)F)=C1)N(CC2)C(C=C3)=C2C=C3C4=CN(C(C)C)C5=NC=NC(N)=C54	0.01
22d	O=C(CC1=CC=CC(OC(F)(F)F)=C1)N(CC2)C(C=C3)=C2C=C3C4=CN(CCC)C5=NC=NC(N)=C54	0.031
22e	O=C(CC1=CC=CC(OC(F)(F)F)=C1)N(CC2)C(C=C3)=C2C=C3C4=CN(CCCC)C5=NC=NC(N)=C54	0.01
22f	O=C(CC1=CC=CC(OC(F)(F)F)=C1)N(CC2)C(C=C3)=C2C=C3C4=CN(CCOC)C5=NC=NC(N)=C54	0.105
